# Supplementary material for: Quality of asthma care under different primary care models in Canada: a population-based study
Source: PubMed Central journal article supplement (PMC4336688; doi:10.1186/s12875-015-0232-y), 2015-02-14
Supplement: 12875_2015_232_MOESM1_ESM.pdf [file 12875_2015_232_MOESM1_ESM.pdf]

## **Additional file 1: Ontario Asthma Surveillance Information System Administrative**

### **Databases**

1. Ontario Health Insurance Plan Database: contains information on fee-for-service billings for physician services rendered;
2. National Ambulatory Care Reporting System: contains data for emergency department and outpatient visits;
3. Canadian Institute for Health Information Discharge Abstract Database: records primary diagnosis and up to 24 secondary diagnoses for all hospitalizations;
4. Ontario Registered Persons Database: includes information on sex, birth date, residence postal code, and, if applicable, date of death.
